# Supplementary material
Source: PubMed Central journal article supplement (PMC3367544)
Supplement: cr20124x1.pdf [file cr20124x1.pdf]

## Supplementary information, Figure S1

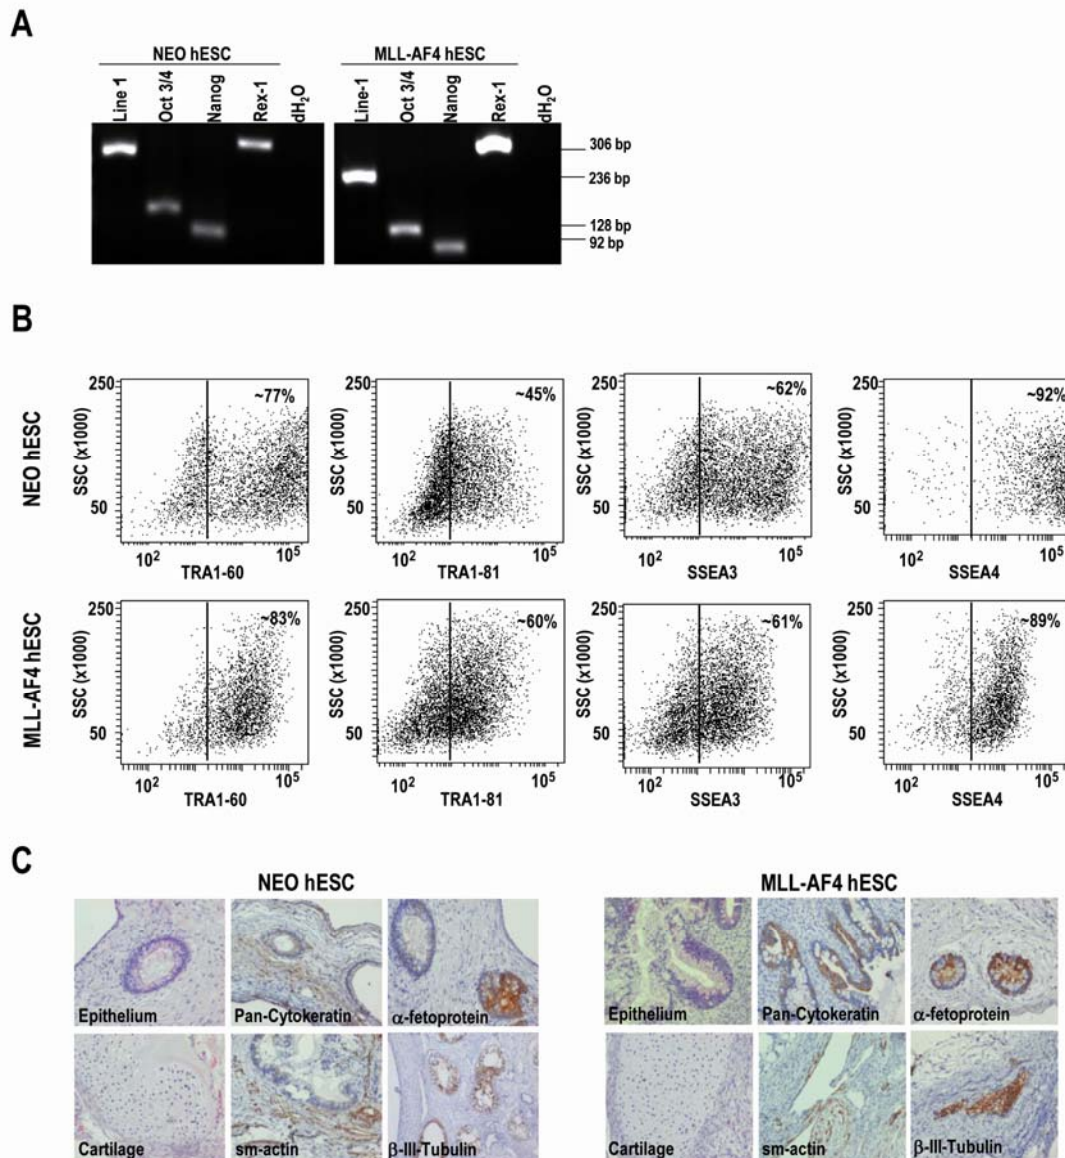

**Figure S1** Enforced expression of MLL-AF4 is compatible with hESC pluripotency. **(A)** RT-PCR showing comparable mRNA expression levels of the pluripotency markers Oct3/4, Nanog and Rex-1 in NEO vs MLL-AF4 hESCs. **(B)** Similar expression of the hESC surface markers TRA-1-60, TRA-1-81, SSEA-3 and SSEA-4 in NEO vs MLL-AF4 hESCs. **(C)** Histological analysis of teratomas formed from NEO- and MLL-AF4 hESCs depicting three germ layer developmental potential.
