# Supplementary material
Source: PubMed Central journal article supplement (PMC3367544)
Supplement: cr20124x2.pdf [file cr20124x2.pdf]

## Supplementary information, Figure S2

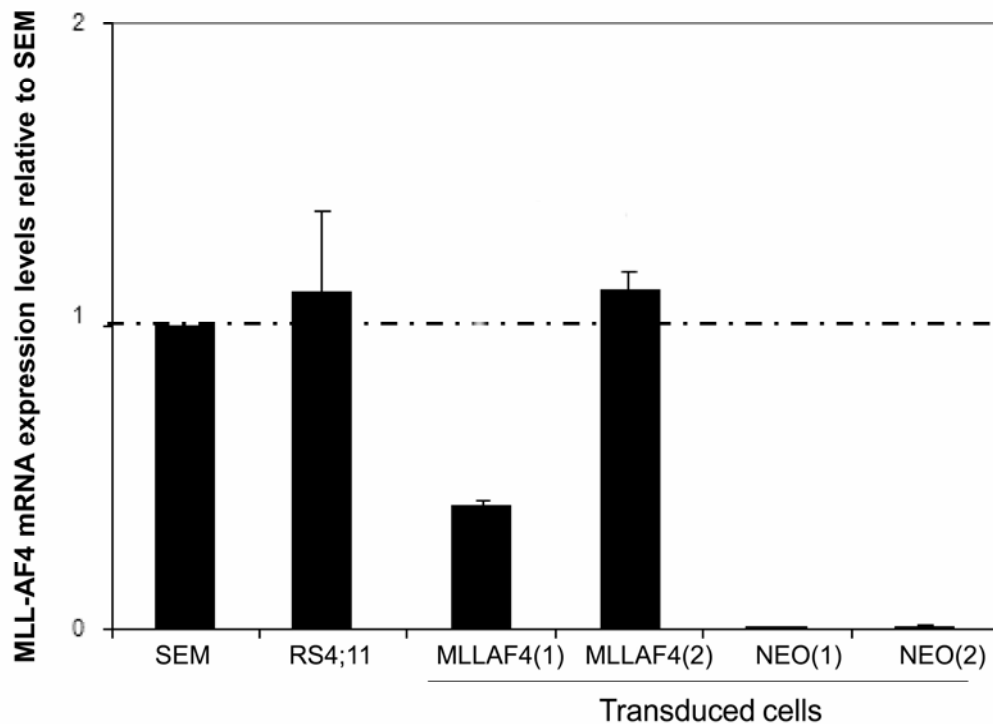

**Figure S2** Q-RT-PCR comparing the expression levels of MLL-AF4 in MLL-AF4-carrying leukemic cell lines and MLL-AF4-transduced human stem cells. MLL-AF4 expression was analyzed in the leukemic cell lines SEM and RS4;11 as well as in human stem cells transduced with MLL-AF4 or NEO (negative control). This data suggests that the lentiviral-based expression of MLL-AF4 in experimentally transduced cells is close to physiological.
