# Supplementary material
Source: PubMed Central journal article supplement (PMC3367544)
Supplement: cr20124x3.pdf [file cr20124x3.pdf]

## Supplementary information, Figure S3

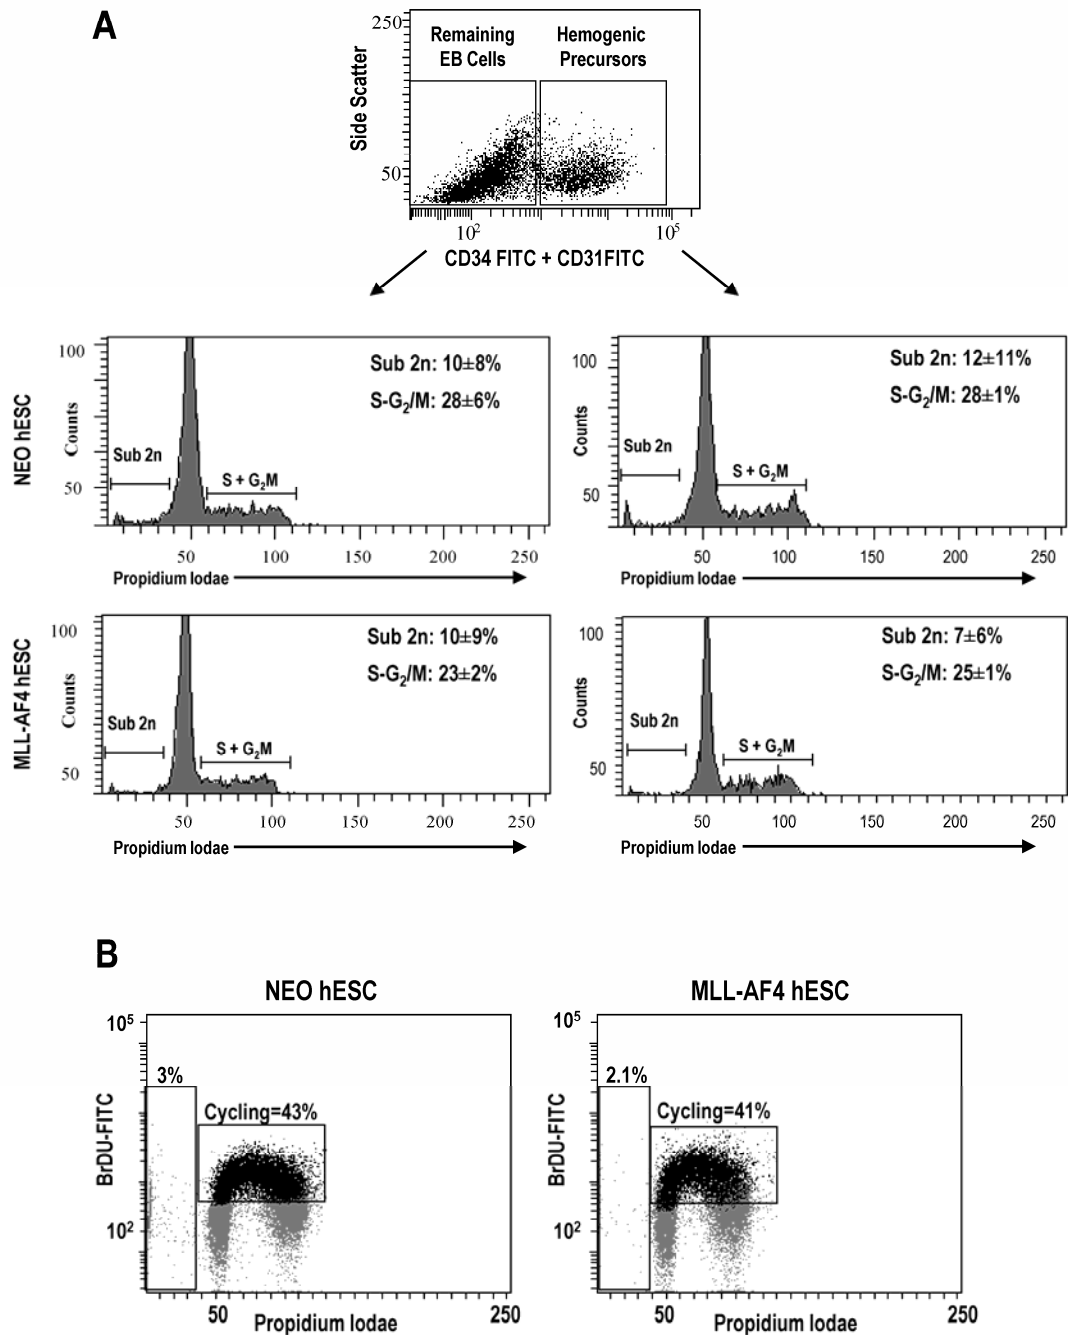

**Figure S3** Cell cycle analysis reveals that the expression of MLL-AF4 promotes specification of hESCs into hemogenic precursors rather than enhanced proliferation or survival of the emerging hemogenic precursors. **(A)** Flow cytometric analysis revealing similar cell cycle distribution and Sub-G<sub>0</sub>/G<sub>1</sub> fraction in hemogenic precursors

(CD31<sup>+</sup>CD34<sup>+</sup>) and remaining cells within the EBs (CD31<sup>-</sup>CD34<sup>-</sup>) at day 11 of EB development in NEO- and MLL-AF4 hESCs. Data is presented as mean  $\pm$  SEM for 3 independent experiments. **(B)** No differences in the proportion of cycling (BrdU<sup>+</sup>) or apoptotic (Sub-G0/G1) cells are found in NEO *versus* MLL-AF4 hESCs.
