# Supplementary material
Source: PubMed Central journal article supplement (PMC3367544)
Supplement: cr20124x4.pdf [file cr20124x4.pdf]

## Supplementary information, Figure S4

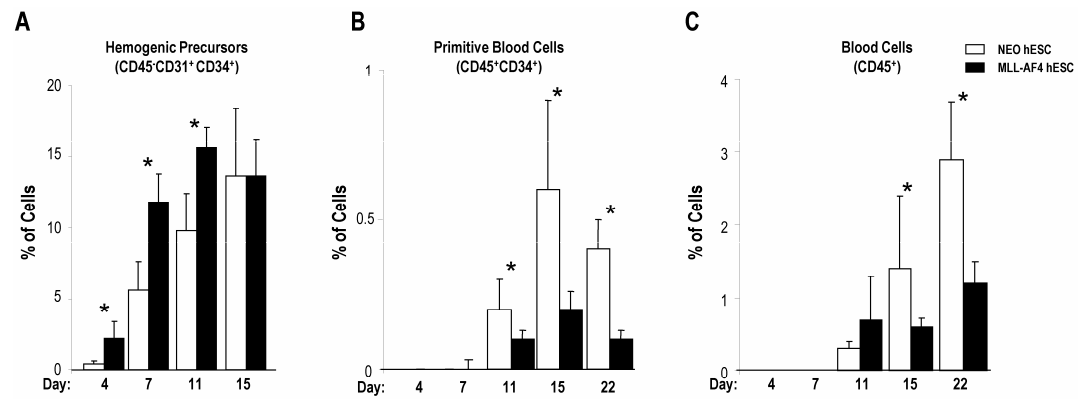

**Figure S4** Spontaneous hEB differentiation reveals that MLL-AF4 augments hemogenic precursor specification and impairs further hematopoietic commitment regardless the presence of hematopoietic cytokines.
