# Supplementary material
Source: PubMed Central journal article supplement (PMC3367544)
Supplement: cr20124x6.pdf [file cr20124x6.pdf]

## Supplementary information, Figure S6

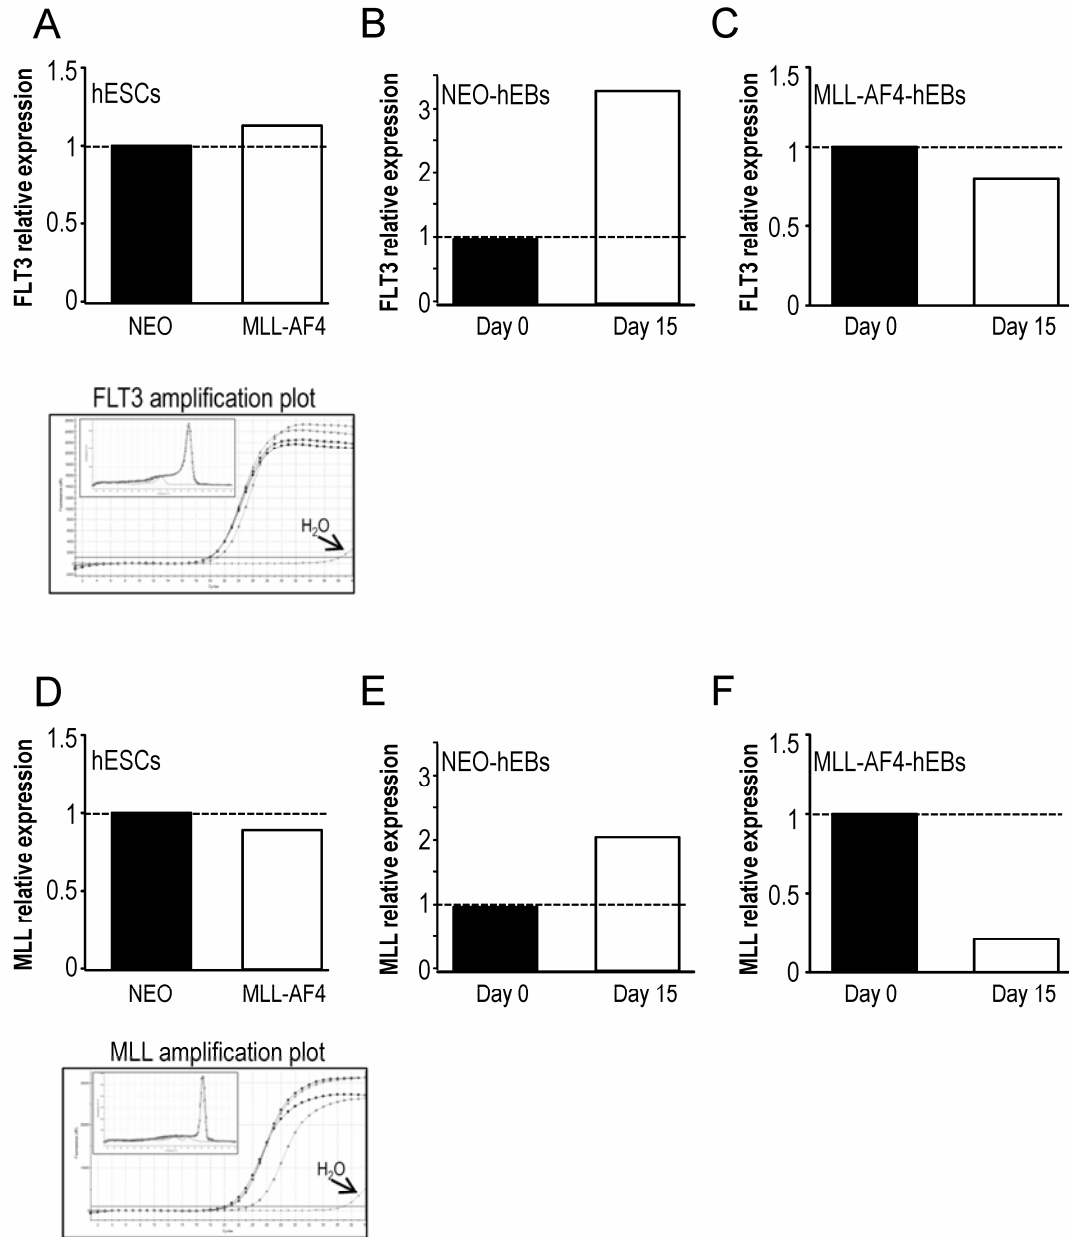

**Figure S6** mRNA expression of FLT3 (A-C) and wild-type MLL (D-F) in NEO- and MLL-AF4-expressing hESCs and day 15 hEBs.
