# Supplementary material
Source: PubMed Central journal article supplement (PMC3367544)
Supplement: cr20124x8.pdf [file cr20124x8.pdf]

Supplementary information, Table S2 Primer sequences used in the present study

| Gene           | Sequence (5'-3')                      |
|----------------|---------------------------------------|
| Neo            | Forward: TTCTCCTCTTCCTCATCTC          |
|                | Reverse: CAGTCATAGCCGAATAGC           |
| MLL-AF4        | Forward: CAGAGCAAACAGAAAAAGTG         |
|                | Reverse: GTTCTGGAAGGGACTGTGGA         |
| Line-1         | Forward: GCTGGATATGAAATTCTGGGTTGA     |
|                | Reverse: AGGAAATACAGAGAACGCCACAA      |
| Oct-3/4        | Forward: TCTGCAGAAAGAACTCGAGCAA       |
|                | Reverse: AGATGGTCGTTTGGCTGAACAC       |
| Nanog          | Forward: TGCAGTTCAGCCAAATTCTC         |
|                | Reverse: CCTAGTGGTCTGCTGTATTACATTAAGG |
| Rex-1          | Forward: CAGATCCTAACAGCTCGCAGAAT      |
|                | Reverse: GCGTACGCAAATTAAGTCCAGA       |
| VE-Cadherin    | Forward: ACTCTGCAAGACATCAATGACAACCT   |
|                | Reverse: GGTGTCTTCAGGCACGACAA         |
| vWF            | Forward: GAGCTTTGACAACAGATACTTCACCTT  |
|                | Reverse: CAGCACACTGGACAGTCTCAATG      |
| $\beta$ -Actin | Forward: CTCCTTCTGGGCATGGAGT          |
|                | Reverse: TCTCCTTCTGCATCCTGTCCGGAAT    |
| HoxA9          | Forward: AAGACCGAGCAAAAGACGAG         |
|                | Reverse: GGGTGAGAGAAGGGAGAAGG         |
| HoxB4          | Forward: CACGGTAAACCCCAATTACG         |
|                | Reverse: TTCCTTCTCCAGCTCCAAGA         |
| Meis1          | Forward: AAAAGCGTCACAAAAGCGT          |
|                | Reverse: GATGGTGAGTCCCGTGTCTT         |
